# Supplementary material
Source: Springer Nature journal article supplement (https://www.springermedizin.de/resource/supplementary/12943_2010_904_MOESM9_ESM.pdf/9551960)

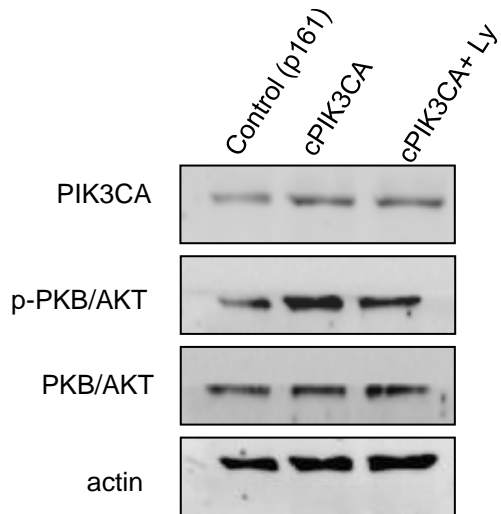

A

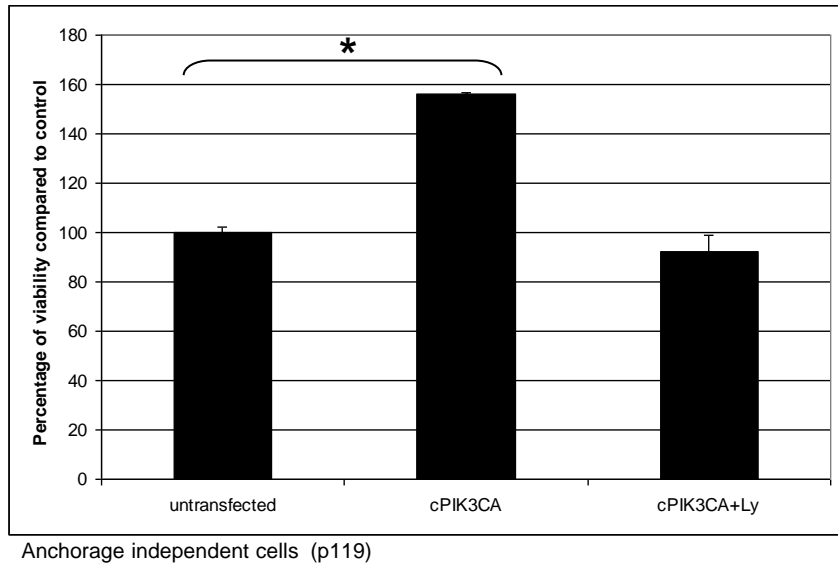

B

Supplement: MOESM9 [file 9551960]
